# Supplementary material
Source: publisher site journal article supplement (https://www.spandidos-publications.com/8394/downloadSupplementary)

Figure S1. Heatmap of top 50 differentially expressed-microRNAs.

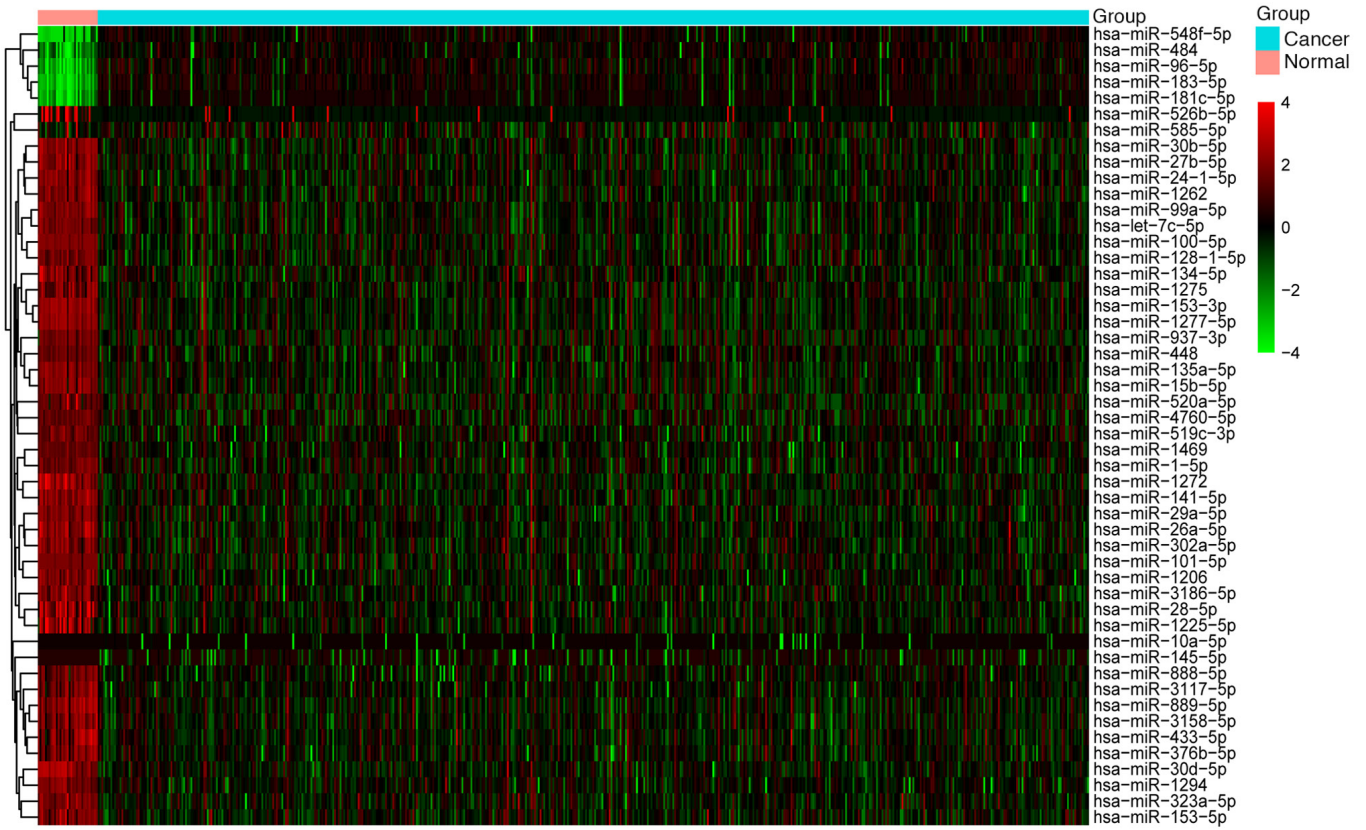

Supplement: Supplementary file 1 [file downloadSupplementary]
